# Supplementary material for: An insight into the hydrogen bonding, halogen bonding and chalcogen bonding interactions in manganese(iii) complexes with N2O2donor salicylidine Schiff base ligands
Source: Royal Society of Chemistry journal article supplement (doi:10.1039/d3ra04044e), 2023-01-01
Supplement: d3ra04044e1.pdf [file d3ra04044e1.pdf]

# **An insight to the hydrogen bonding, halogen bonding and chalcogen bonding interactions in the manganese(III) complexes with N<sub>2</sub>O<sub>2</sub> donor salicylidine Schiff base ligands**

**Mridul Karmakar<sup>a</sup>, WahedurSk<sup>a</sup>, Rosa M. Gomila<sup>b</sup>, M.G.B. Drew<sup>c</sup>, Antonio Frontera<sup>b,\*</sup>, Shouvik Chattopadhyay<sup>a,\*</sup>**

<sup>a</sup>Department of Chemistry, Jadavpur University, Kolkata-700032, West Bengal, India. Email: [shouvik.chattopadhyay@jadavpuruniversity.in](mailto:shouvik.chattopadhyay@jadavpuruniversity.in)

<sup>b</sup>Departamento de Química, Universitat de les Illes Balears, Crta.deValldemossakm 7.5, 07122 Palma, Balears, Spain; E-mail: [toni.frontera@uib.es](mailto:toni.frontera@uib.es)

<sup>c</sup>School of Chemistry, The University of Reading, P.O. Box 224, Whiteknights, Reading RG6 6AD, UK

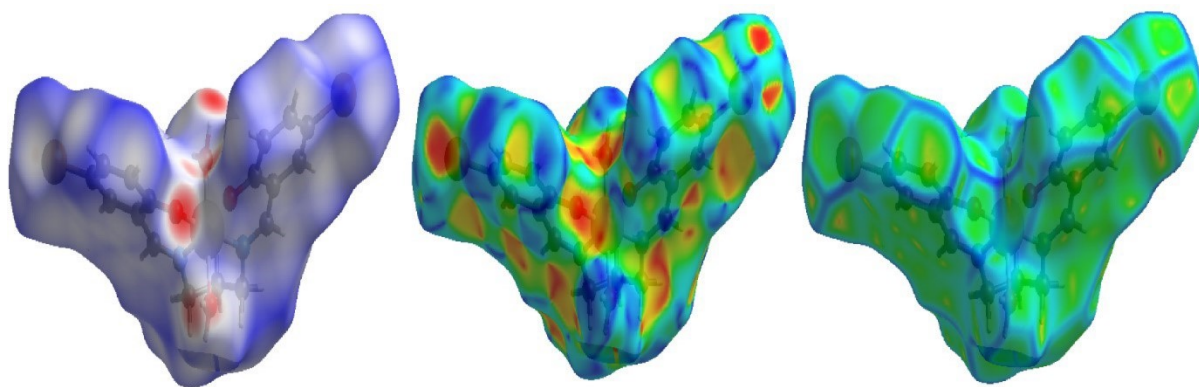

**Complex 1**

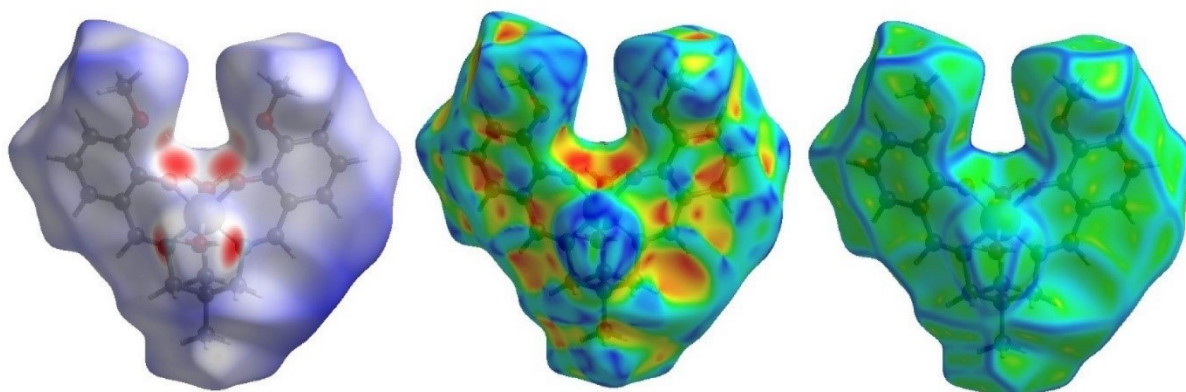

**Complex 2**

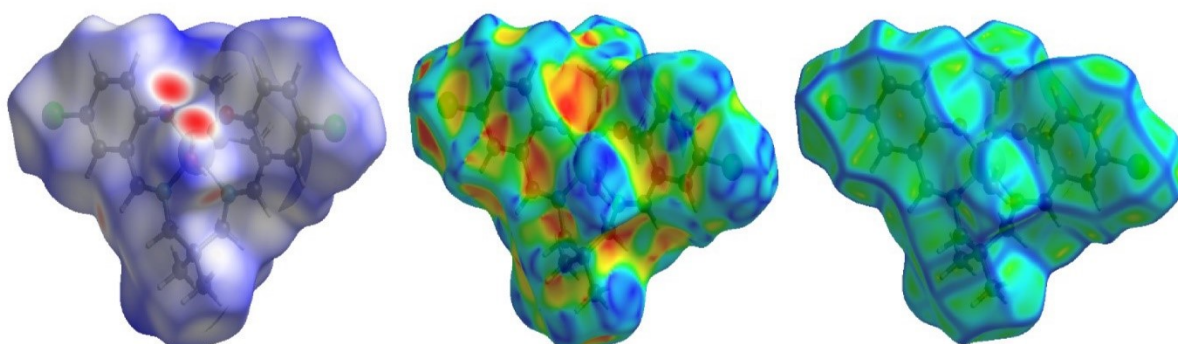

**Complex 3**

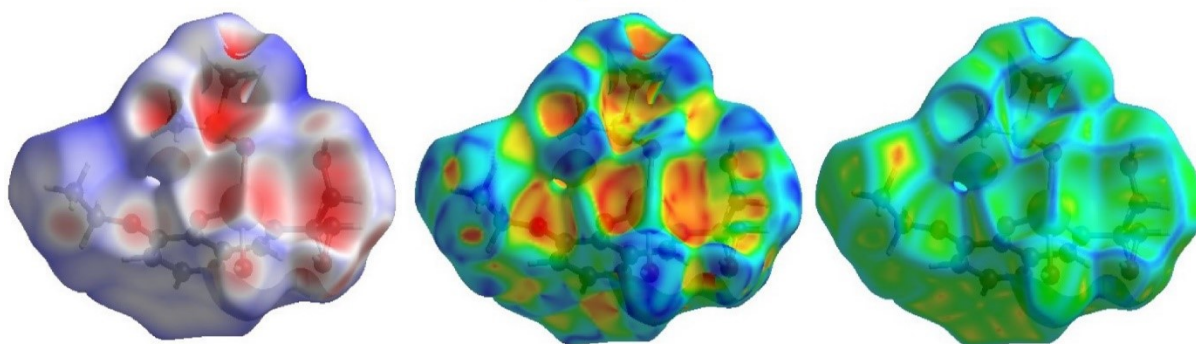

**Complex 4**

**Figure S1.** Hirshfeld surfaces mapped with  $d_{norm}$  (left-side), shape index (middle), and curvedness (right-side).

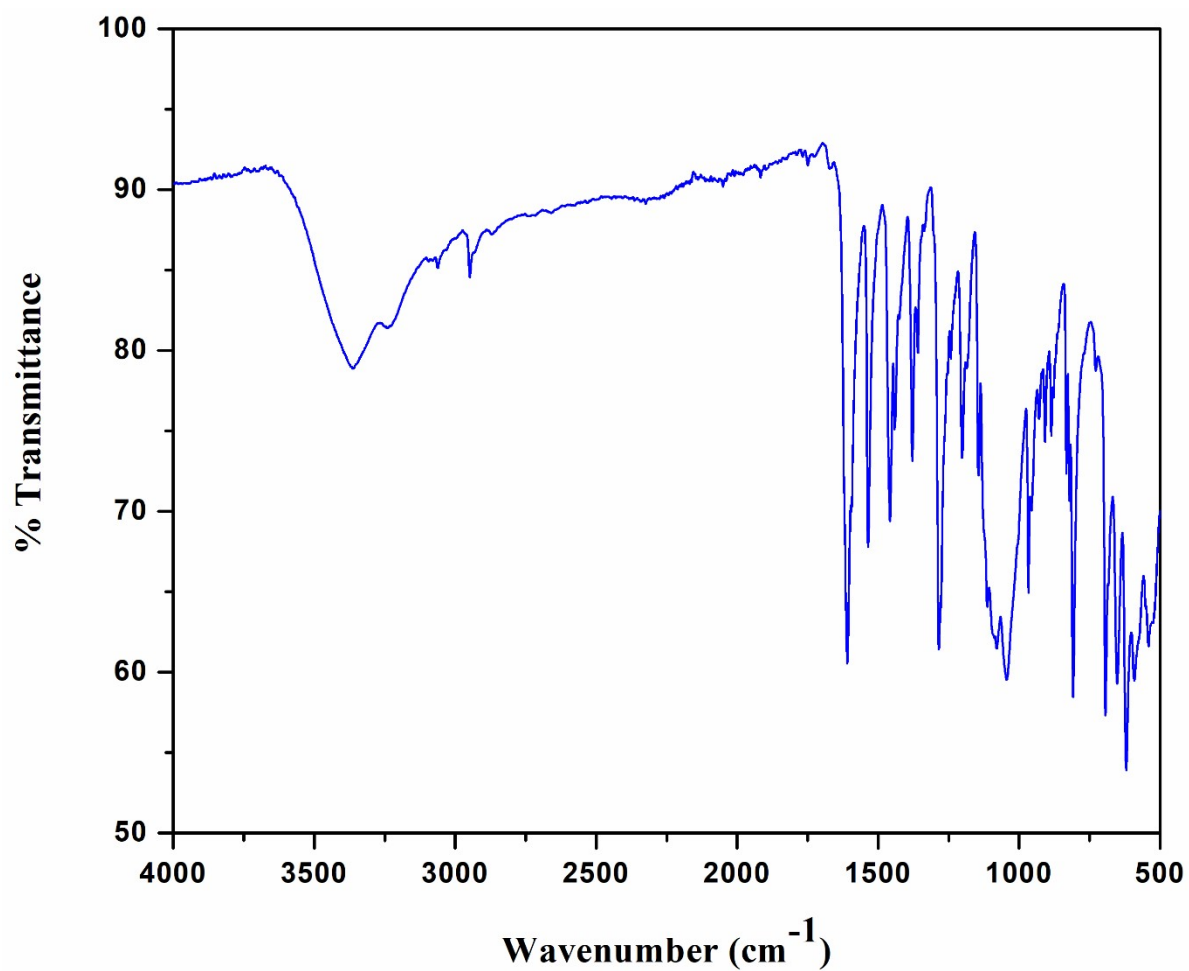

**Figure S2.** The IR spectrum of complex 1.

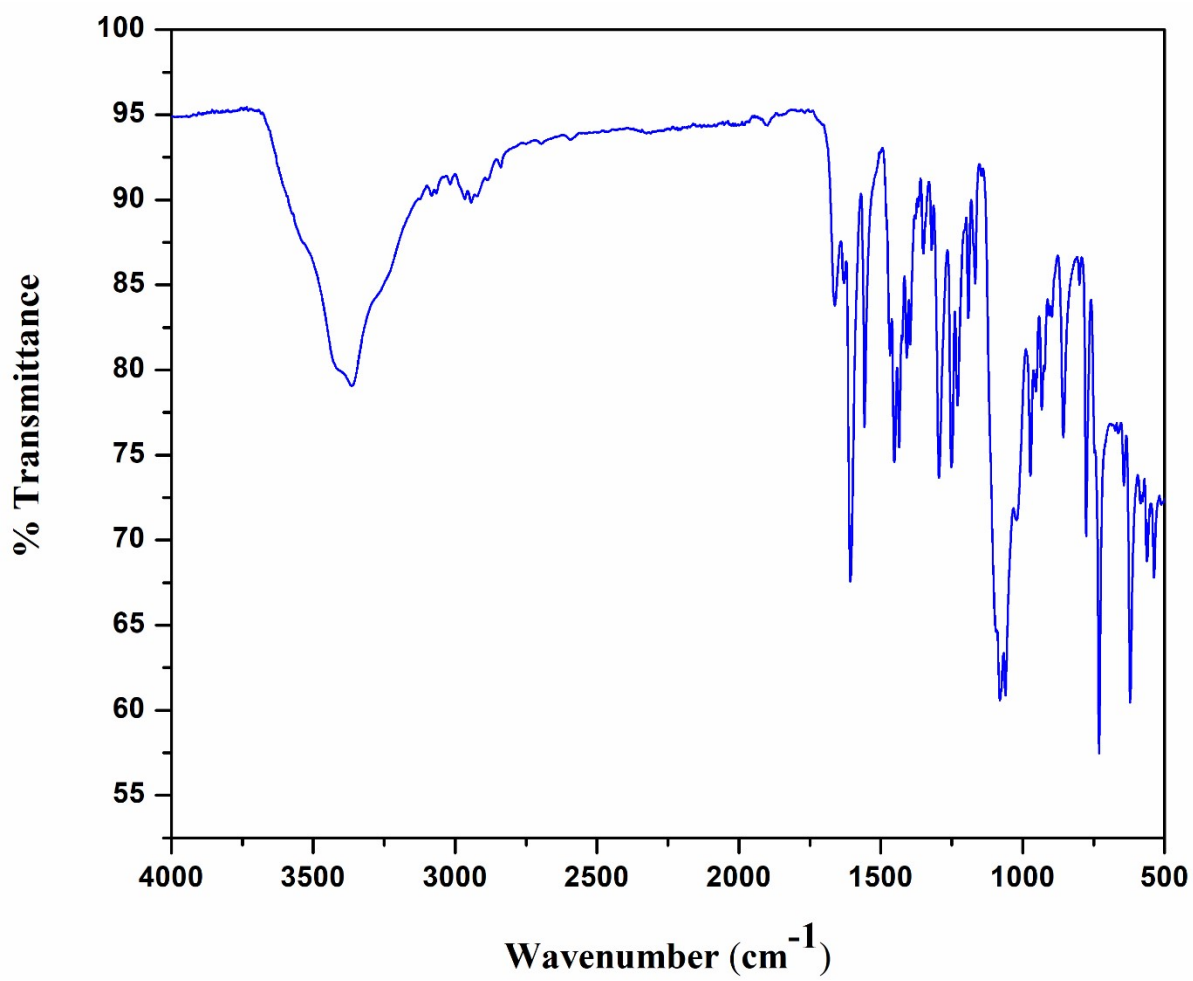

**Figure S3.** The IR spectrum of complex 2.

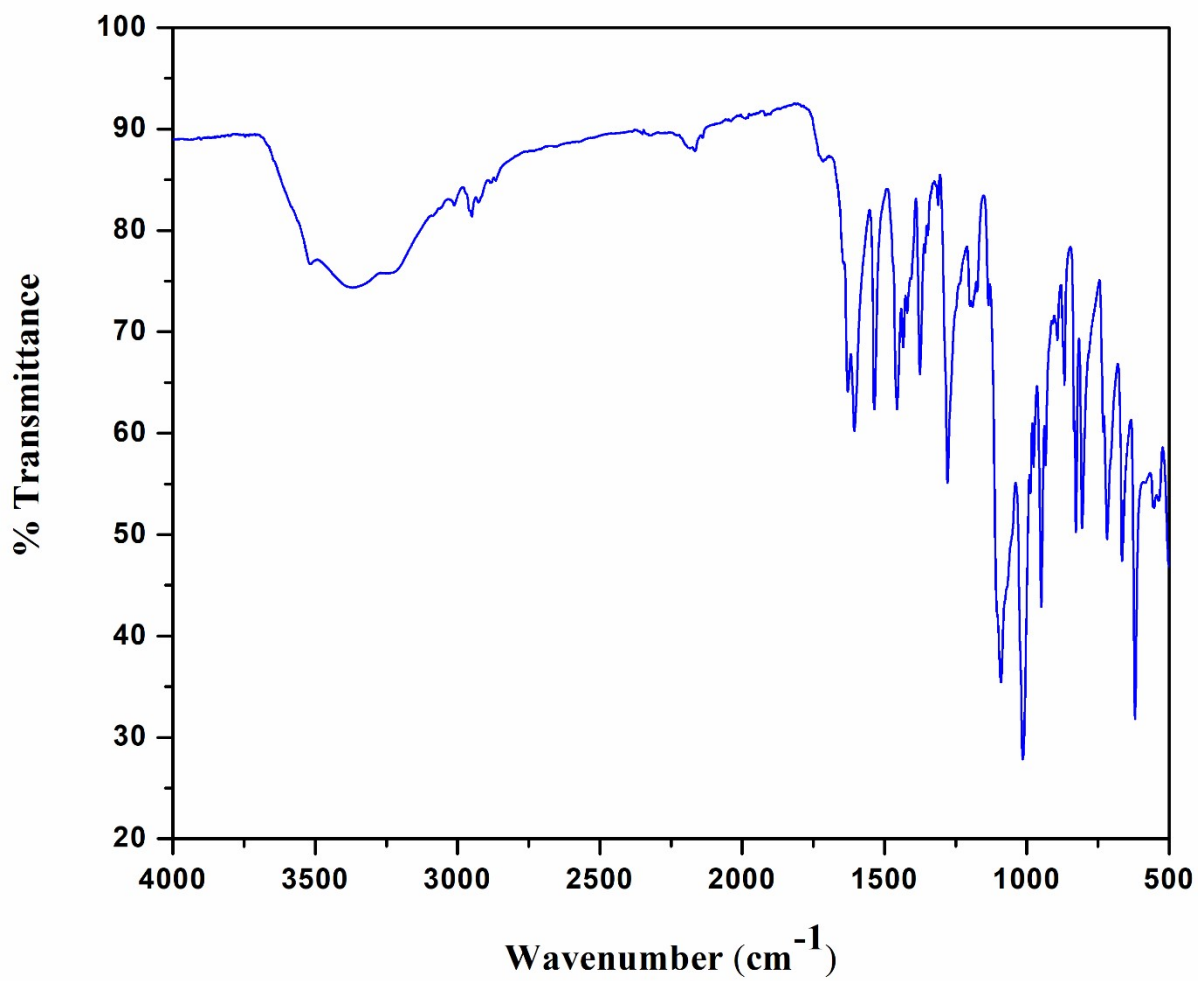

**Figure S4.** The IR spectrum of complex **3**.

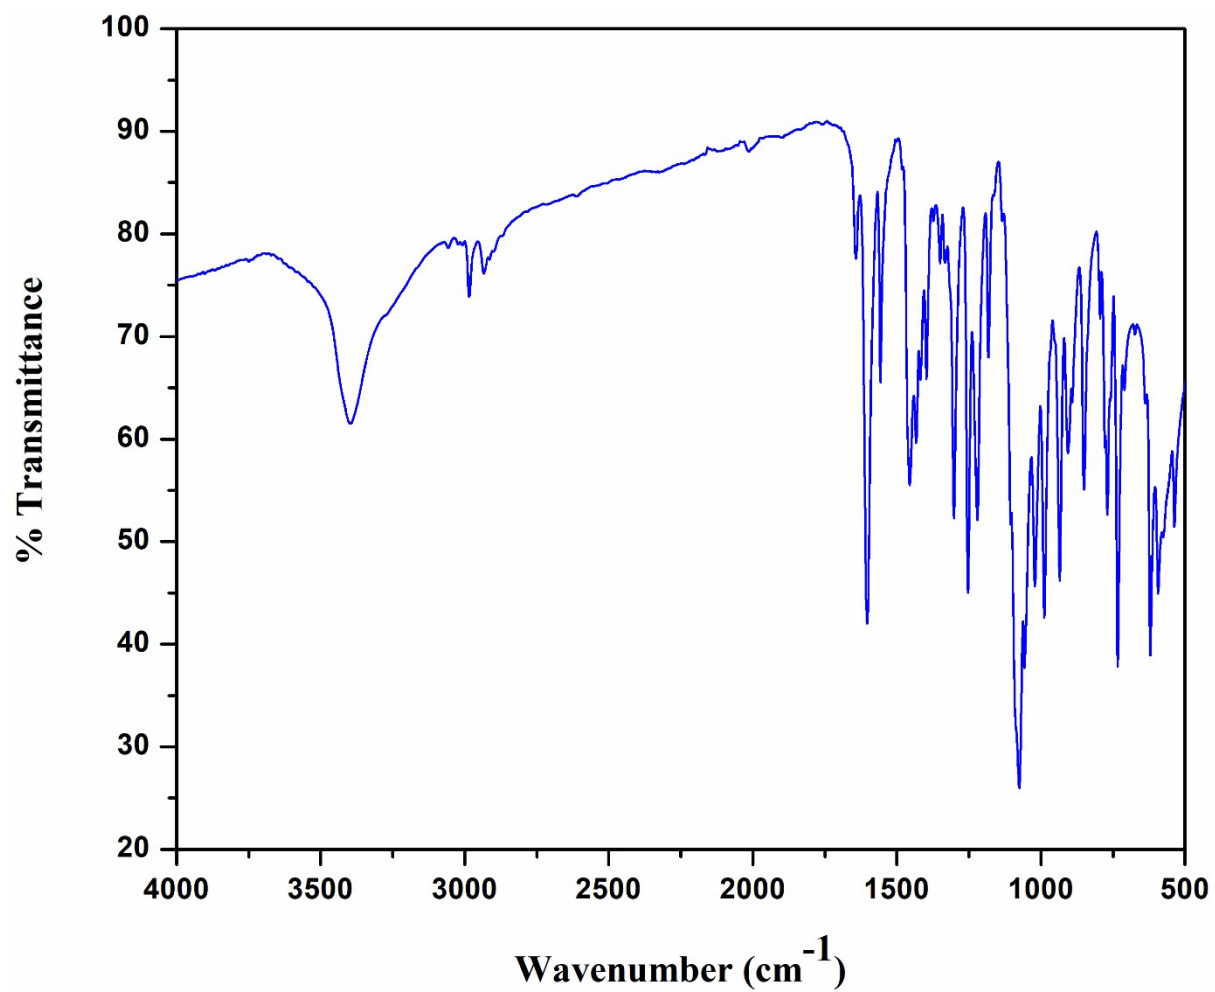

**Figure S5.** The IR spectrum of complex 4.

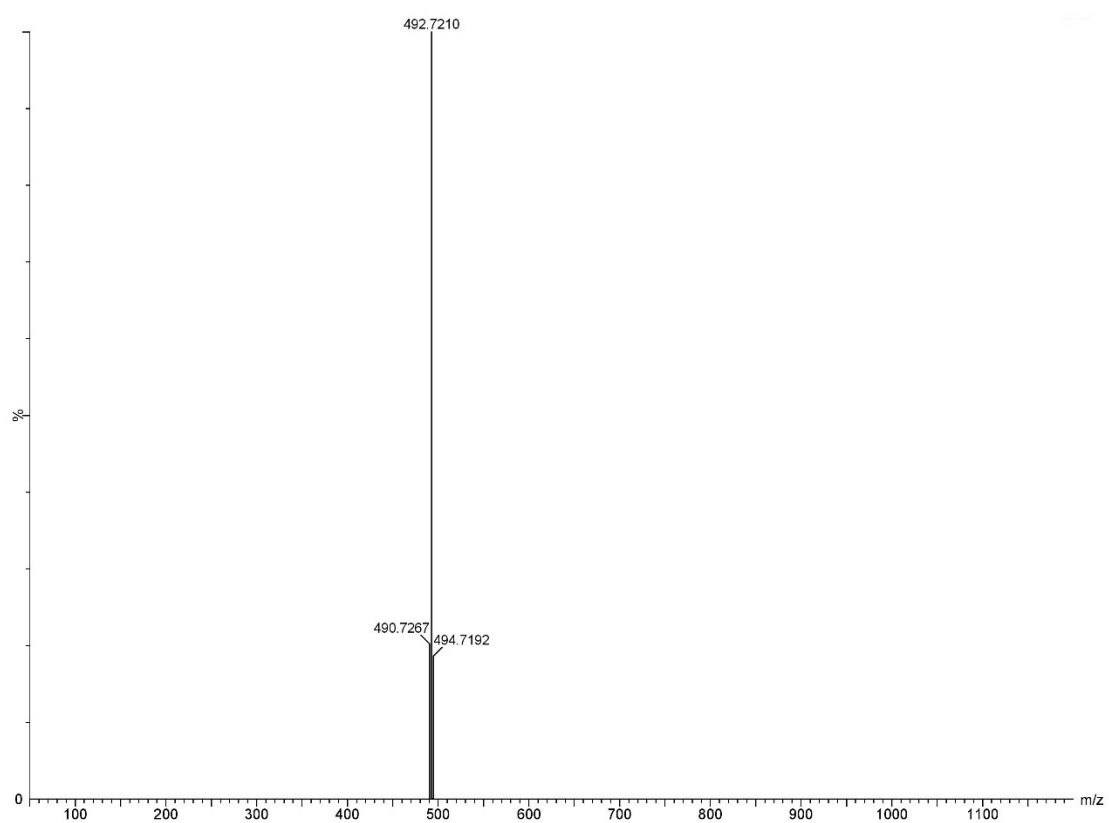

**Figure S6.** HRMS-ESI mass spectrum of complex **1** in acetonitrile medium.

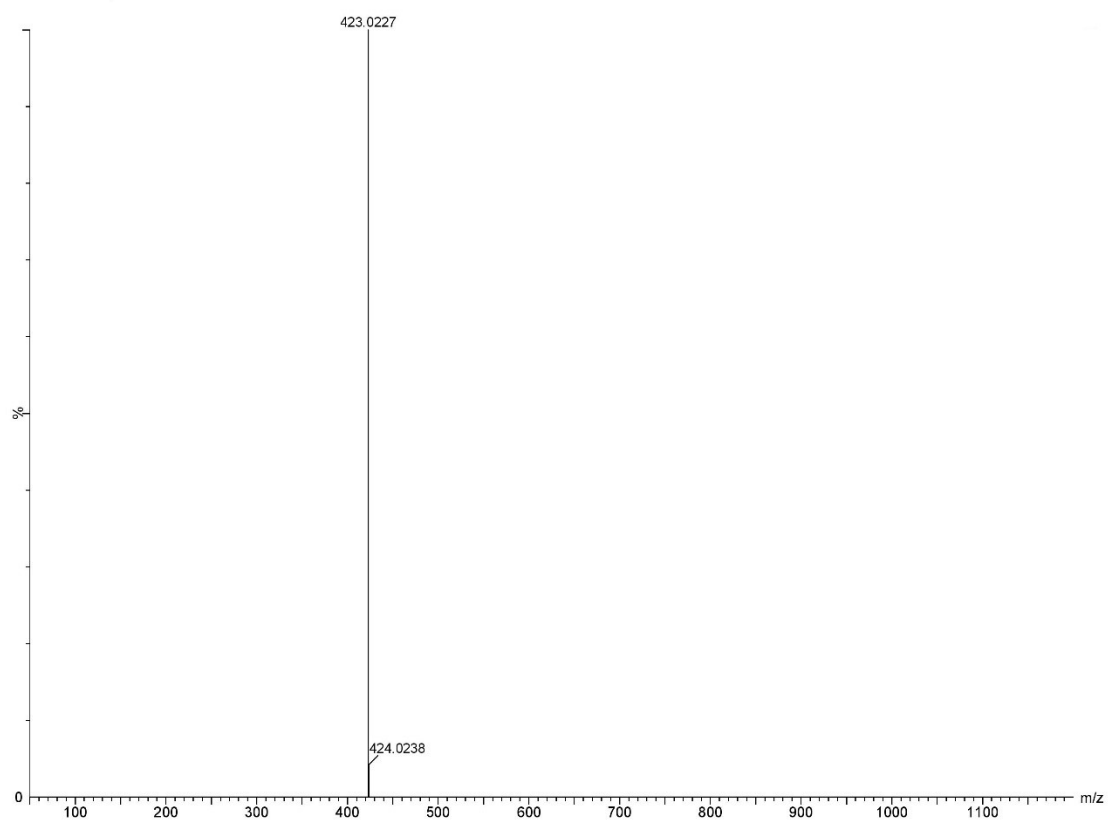

**Figure S7.** HRMS-ESI mass spectrum of complex **2** in acetonitrile medium.



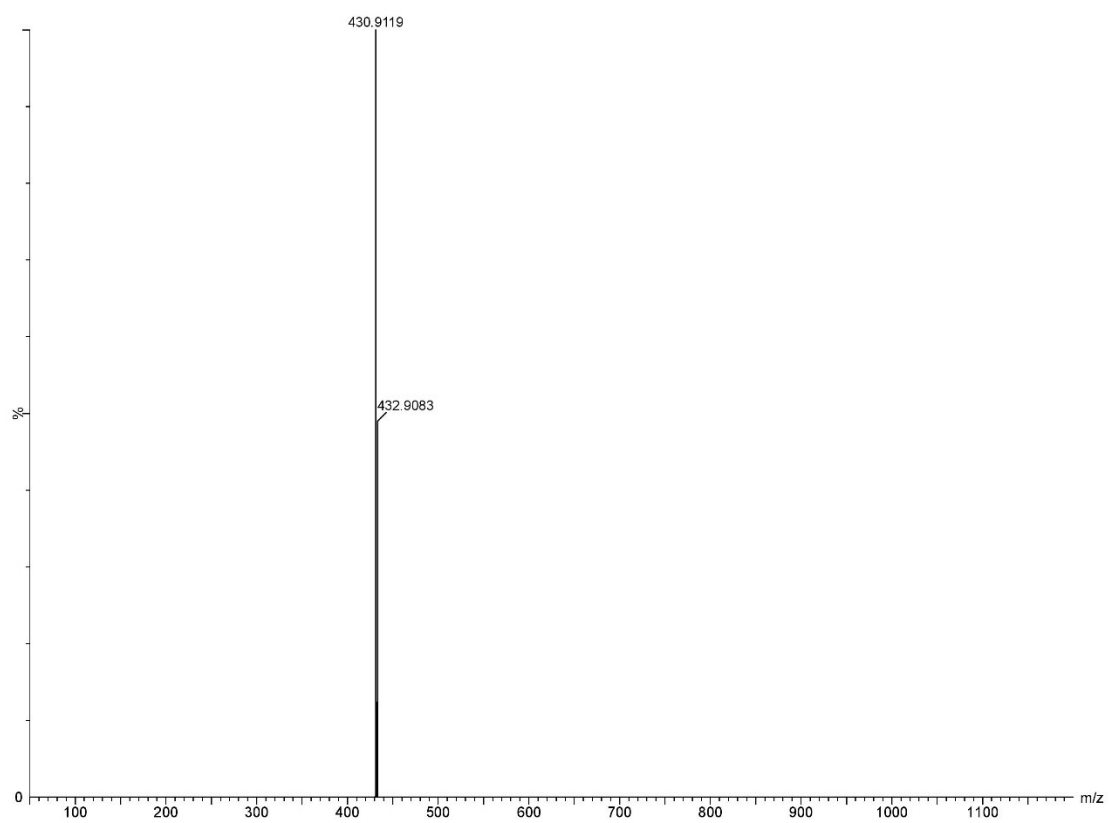

**Figure S8.** HRMS-ESI mass spectrum of complex **3** in acetonitrile medium.

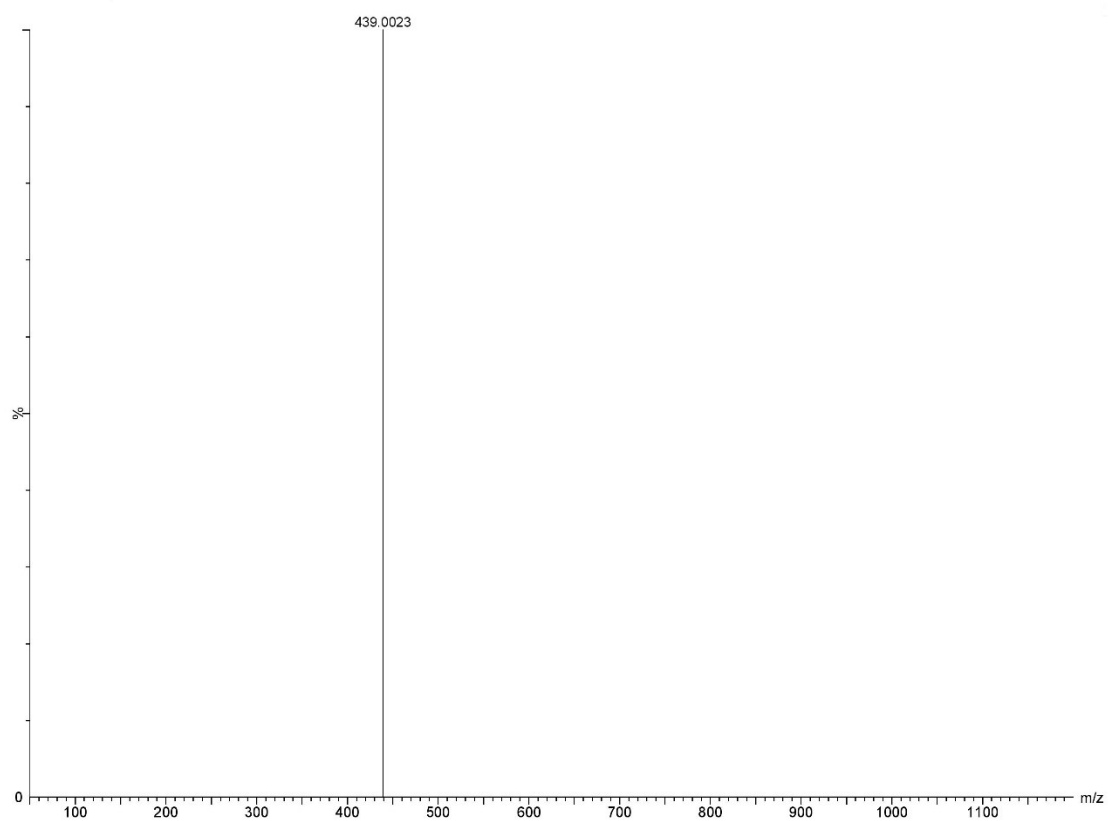

**Figure S9.** HRMS-ESI mass spectrum of complex **4** in acetonitrile medium.

**Table S1.** Crystal data and refinement details of Complexes **1 - 4**.

| Complex                                 | 1                                                                                 | 2                                                                                              | 3                                                                                 | 4                                                                    |
|-----------------------------------------|-----------------------------------------------------------------------------------|------------------------------------------------------------------------------------------------|-----------------------------------------------------------------------------------|----------------------------------------------------------------------|
| Formula                                 | C <sub>17</sub> H <sub>20</sub> Br <sub>2</sub> ClMnN <sub>2</sub> O <sub>9</sub> | C <sub>42</sub> H <sub>58</sub> Cl <sub>2</sub> Mn <sub>2</sub> N <sub>4</sub> O <sub>21</sub> | C <sub>21</sub> H <sub>26</sub> Cl <sub>3</sub> MnN <sub>2</sub> O <sub>8</sub> S | C <sub>23</sub> H <sub>30</sub> ClMnN <sub>2</sub> O <sub>11</sub> S |
| Molecular Weight                        | 646.54                                                                            | 1133.69                                                                                        | 627.79                                                                            | 632.94                                                               |
| Temperature (K)                         | 273                                                                               | 273                                                                                            | 273                                                                               | 273                                                                  |
| Crystal system                          | Orthorhombic                                                                      | Monoclinic                                                                                     | Triclinic                                                                         | Monoclinic                                                           |
| Space group                             | <i>P2<sub>1</sub>2<sub>1</sub>2<sub>1</sub></i>                                   | <i>C2/c</i>                                                                                    | <i>P-1</i>                                                                        | <i>C2/m</i>                                                          |
| a (Å)                                   | 7.8022(3)                                                                         | 29.4946(9)                                                                                     | 10.626(6)                                                                         | 15.4932(6)                                                           |
| b (Å)                                   | 13.8143(6)                                                                        | 7.7686(2)                                                                                      | 11.755(7)                                                                         | 17.3487(7)                                                           |
| c (Å)                                   | 20.8527(9)                                                                        | 25.9950(8)                                                                                     | 11.982(8)                                                                         | 12.3645(5)                                                           |
| α                                       | (90)                                                                              | (90)                                                                                           | 81.815(15)                                                                        | (90)                                                                 |
| β                                       | (90)                                                                              | 120.781(1)                                                                                     | 67.238(15)                                                                        | 123.207(1)                                                           |
| γ                                       | (90)                                                                              | (90)                                                                                           | 74.590(12)                                                                        | (90)                                                                 |
| d <sub>calc</sub> (g cm <sup>-3</sup> ) | 1.911                                                                             | 1.472                                                                                          | 1.569                                                                             | 1.512                                                                |
| Z                                       | 4                                                                                 | 4                                                                                              | 2                                                                                 | 4                                                                    |
| μ                                       | 4.314                                                                             | 0.678                                                                                          | 0.924                                                                             | 0.706                                                                |
| F(000)                                  | 1280                                                                              | 2352                                                                                           | 644                                                                               | 1312                                                                 |
| Total Reflections                       | 67027                                                                             | 31809                                                                                          | 17133                                                                             | 17693                                                                |
| Unique Reflections                      | 3977                                                                              | 4539                                                                                           | 4862                                                                              | 2534                                                                 |
| Observed data [I>2σ(I)]                 | 3837                                                                              | 4002                                                                                           | 3045                                                                              | 2347                                                                 |
| No. of                                  | 305                                                                               | 334                                                                                            | 333                                                                               | 210                                                                  |

|                                               |                |                |                |                |
|-----------------------------------------------|----------------|----------------|----------------|----------------|
| parameters                                    |                |                |                |                |
| R(int)                                        | 0.048          | 0.034          | 0.078          | 0.034          |
| $\mathcal{R}_1, \mathcal{wR}_2$<br>(all data) | 0.0214, 0.0477 | 0.0642, 0.1911 | 0.1406, 0.3176 | 0.0565, 0.1623 |
| $\mathcal{R}_1, \mathcal{wR}_2$<br>[I>2σ(I)]  | 0.0199, 0.0471 | 0.0586, 0.1847 | 0.1028, 0.2774 | 0.0534, 0.1588 |

$$(\mathcal{R}) \mathcal{R}_1 = \Sigma||F_o|-|F_c||/\Sigma|F_o|; (\mathcal{w}) \mathcal{wR}_2 = \Sigma w(|F_o|^2-|F_c|^2)^2/\Sigma w|F_o|^2)^{1/2}$$
